# Supplementary material for: A Theranostic Nanocomplex Combining with Magnetic Hyperthermia for Enhanced Accumulation and Efficacy of pH-Triggering Polymeric Cisplatin(IV) Prodrugs
Source: MDPI journal article supplement (doi:10.3390/ph15040480), 2022-04-14
Supplement: s1 [file s1]

## Supplementary Materials

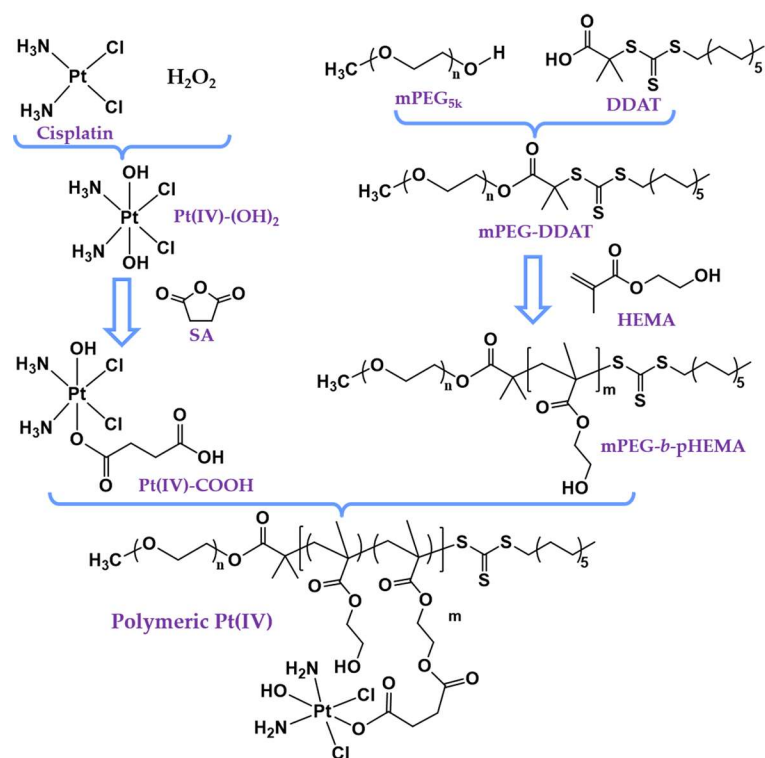

Figure S1: Synthetic scheme of polymeric Pt(IV)

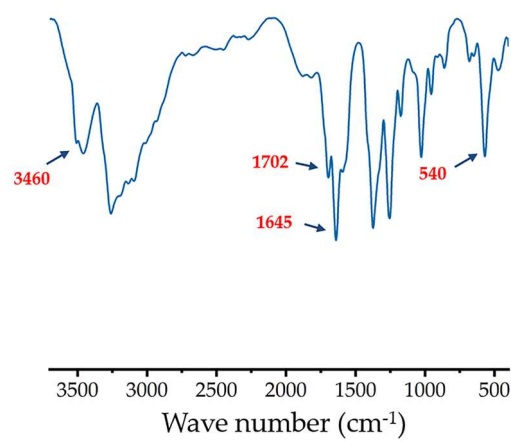

Figure S2: FTIR spectrum of Pt(IV)-COOH

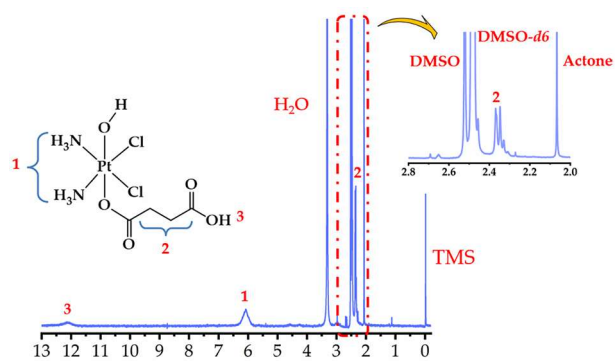

Figure S3:  $^1\text{H}$  NMR spectrum of Pt(IV)-COOH

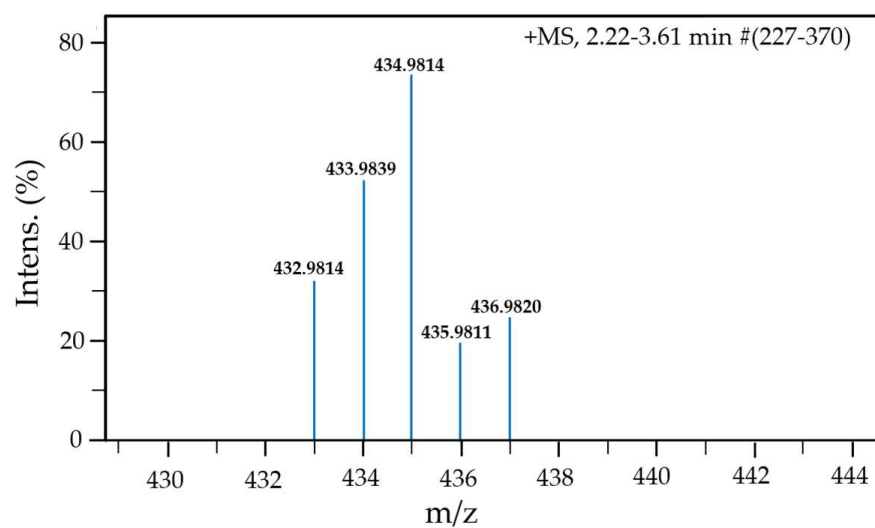

Figure S4: Mass spectrum of Pt(IV)-COOH

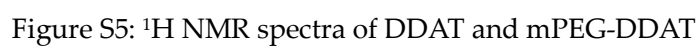

Figure S5:  $^1\text{H}$  NMR spectra of DDAT and mPEG-DDAT

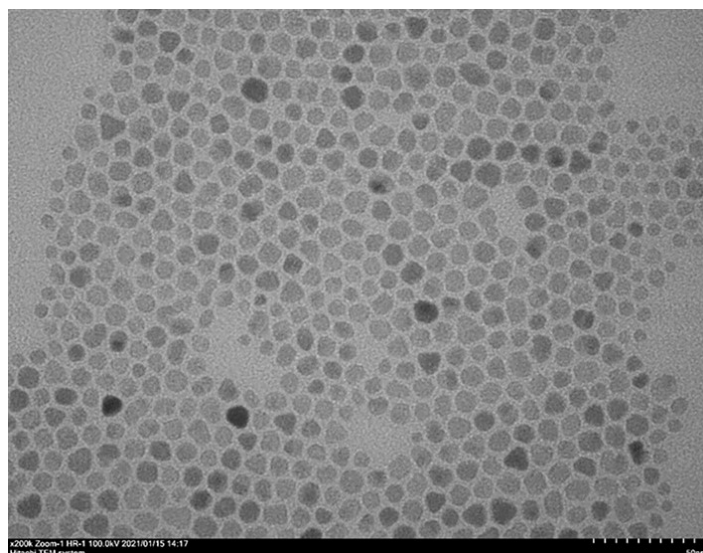

Figure S6: TEM result of monodispersed  $\text{Mn}_{0.6}\text{Zn}_{0.4}\text{Fe}_2\text{O}_4$  nanoparticles

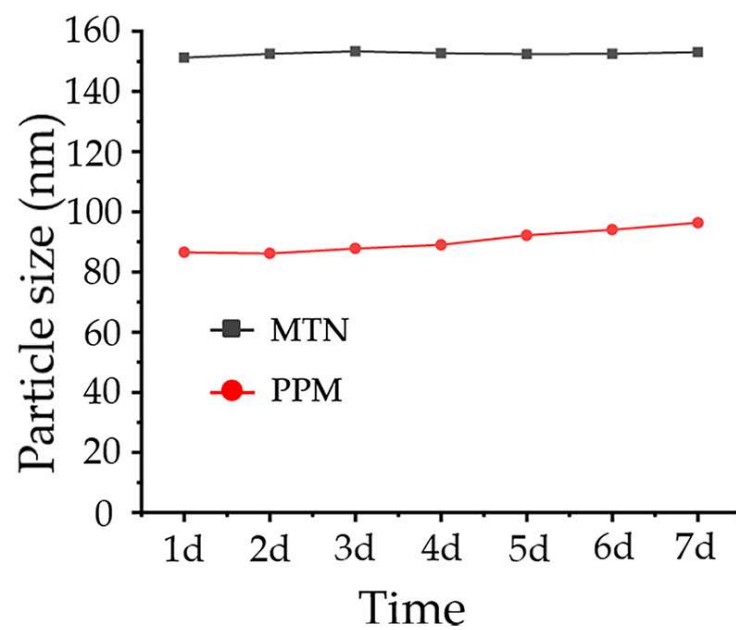

Figure S7: The time-dependent hydrodynamic diameter of PPM and MTN in PBS

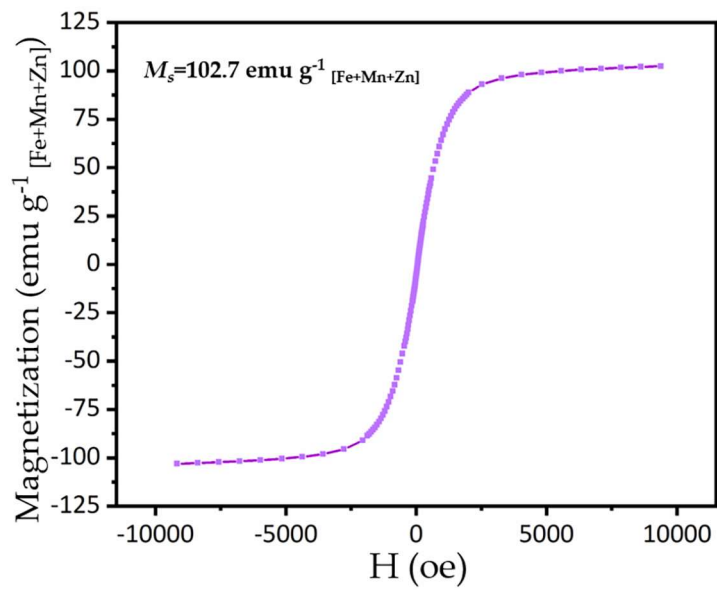

Figure S8: Magnetization curve of the Mn<sub>0.6</sub>Zn<sub>0.4</sub>Fe<sub>2</sub>O<sub>4</sub> at 300 K

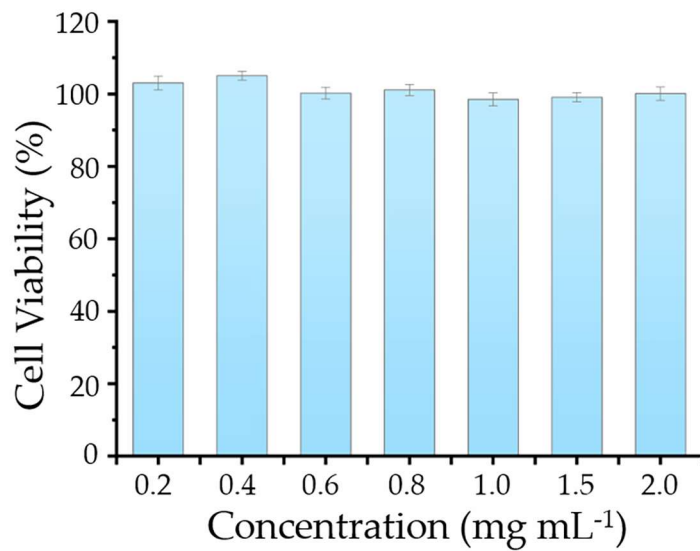

Figure S9: The biocompatibility of mPEG-b-pHEMA
